# Supplementary material
Source: PubMed Central journal article supplement (PMC5716877)
Supplement: NIHMS910110-supplement.pdf [file NIHMS910110-supplement.pdf]

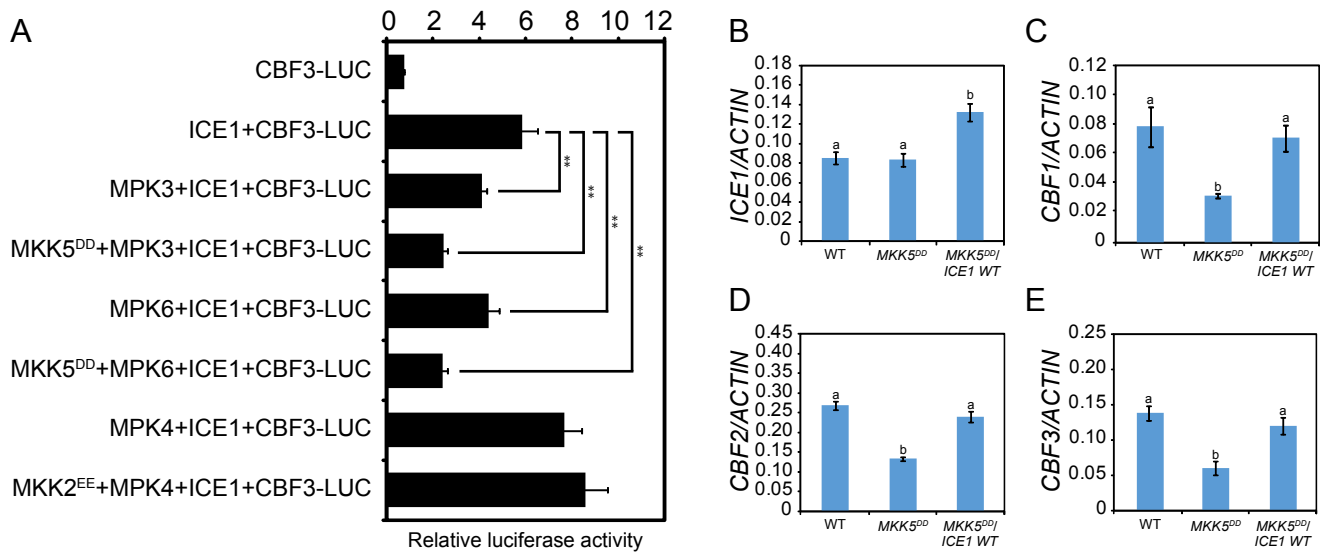

Figure S1. MKK5-MPK3/6 cascade negatively regulates *CBF* gene expression. Related to Figure 2 and 3.

(A) *CBF3-LUC* alone or together with other plasmids was transfected to wild-type protoplasts. The luciferase activity was examined 16 h after transfection. For each transfection, *ZmUBQ::GUS* was also co-transfected, and the activity of *GUS* was assessed and used as the internal control. Asterisks indicate statistically significant differences (\*\* $P < 0.01$ , Student's *t*-test).

(B-E) The seedlings of wild-type, *MKK5<sup>DD</sup>*, *MKK5<sup>DD</sup>/ICE1 pro::ICE1-YFP* were pretreated with Dex for 9 h and then subjected to low temperature treatment for 3 h. Transcript accumulation of *ICE1* and *CBF* genes was assessed by qRT-PCR, and *ACTIN8* was used as the internal control.

Data are means  $\pm$  SD ( $n=3$ ). Different letters represent statistically significant differences ( $P < 0.05$ , one-way ANOVA).

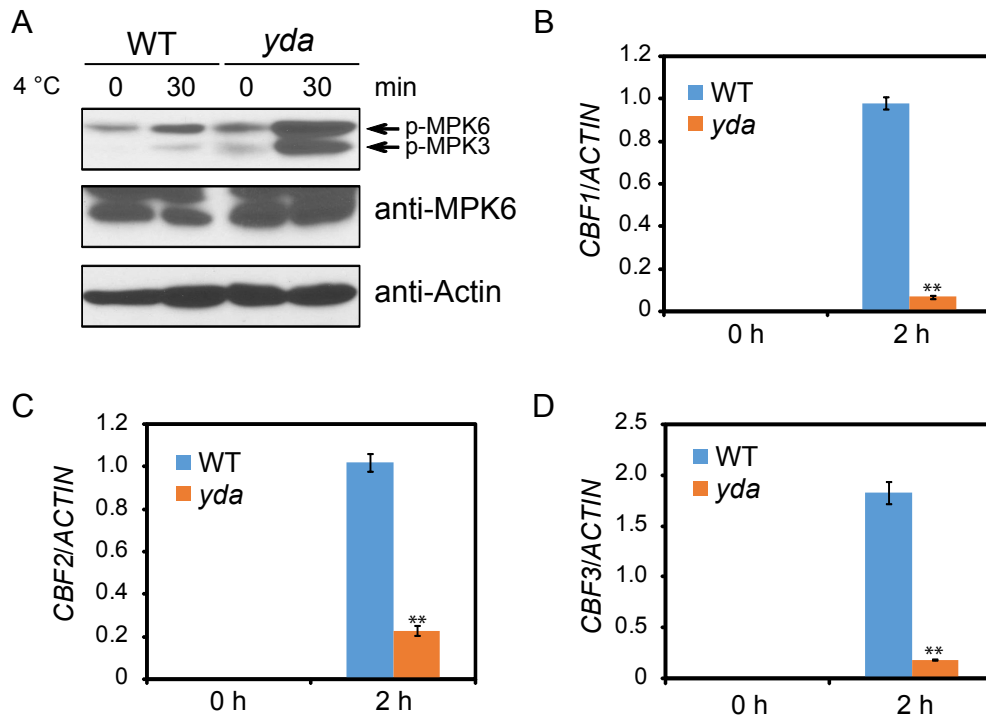

Figure S2. YDA is not required for the cold-induced activation of MPK3 and MPK6. Related to Figure 1.

(A) The seedlings of wild-type and *yda* mutants were treated with low temperature for 0, 15, and 30 min. The immunoblotting assays were performed using anti-pTEpY, anti-MPK6, and anti-Actin.

(B-D) The 12-day-old seedlings of wild-type and *yda* were treated with 4°C for 2 h. Transcript accumulation of *CBF* genes was assessed by qRT-PCR, and *ACTIN8* was used as the internal control.

Data are means  $\pm$  SD (n=3). Asterisks indicate statistically significant differences (\*\*P < 0.01, Student's *t*-test).

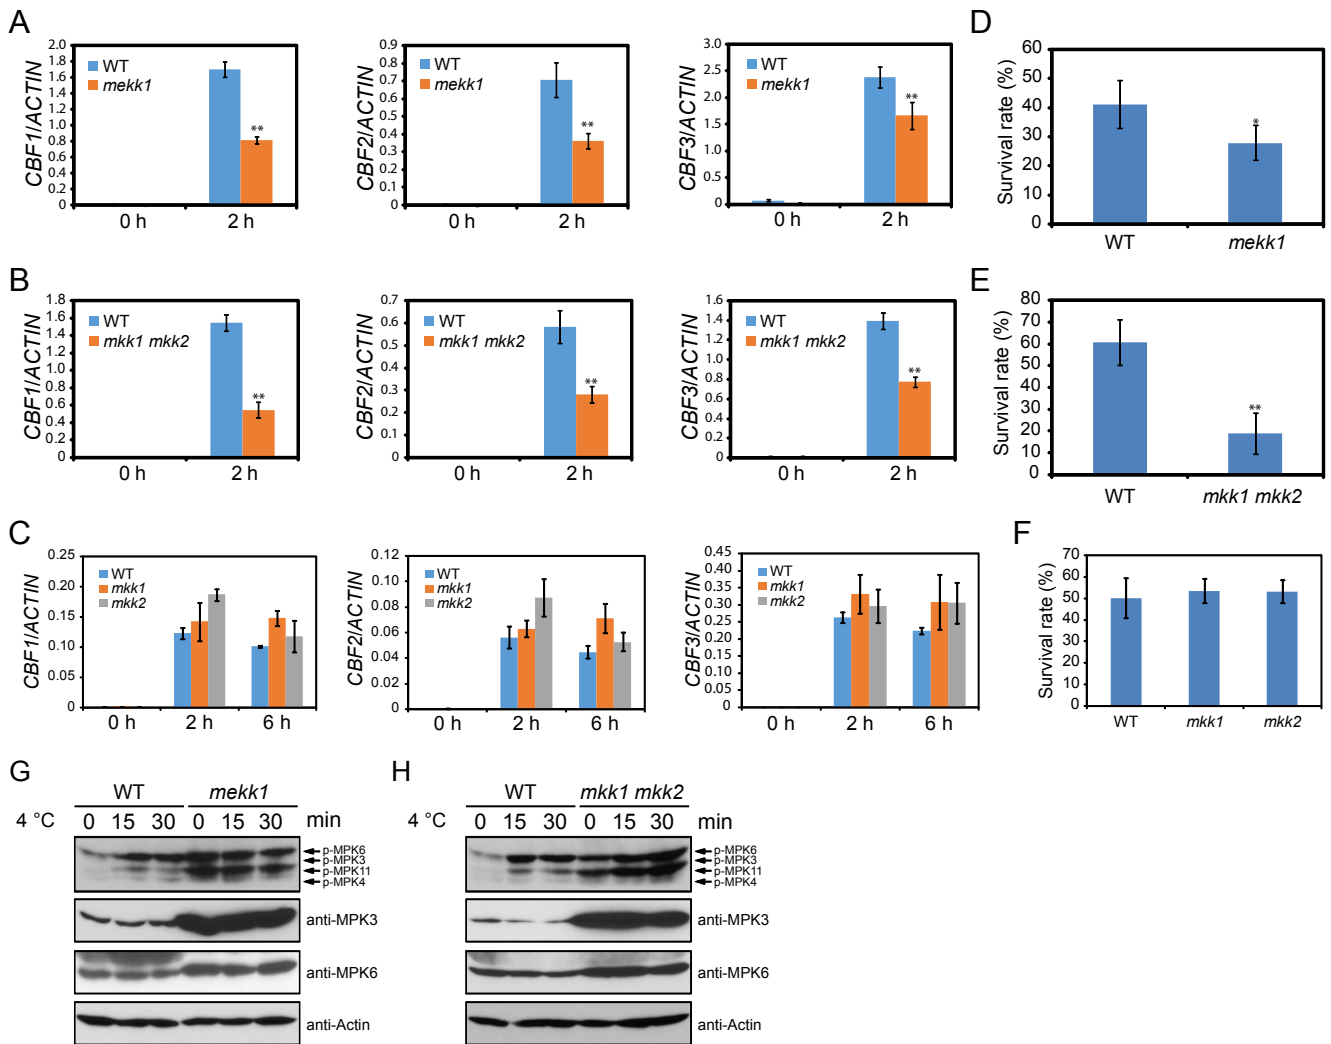

Figure S3. *mekk1* single mutant and *mkk1 mkk2* double mutant are hypersensitive to freezing. Related to Figure 4.

(A-C) The seedlings of *mekk1* (A), *mkk1 mkk2* (B), *mkk1*, and *mkk2* (C) were treated with low temperature (4°C). The transcript accumulation of *CBF* genes was assessed by qRT-PCR, and *ACTIN8* was used as the internal control.

(D-F) The survival rates of freezing-treated *mekk1* (D), *mkk1 mkk2* (E), *mkk1*, and *mkk2* (F) seedlings after 5 days of recovery at 23°C.

(G-H) The 12-day-old seedlings of wild-type and *mekk1* (G) or *mkk1 mkk2* (H) mutants were treated with low temperature for 0, 15, and 30 min. The immunoblotting assays were performed using anti-pTEpY, anti-MPK3, anti-MPK6, and anti-Actin.

Data in (A)-(F) are means  $\pm$  SD (n=3). Asterisks indicate statistically significant differences (\*P < 0.05, \*\*P < 0.01, Student's *t*-test).

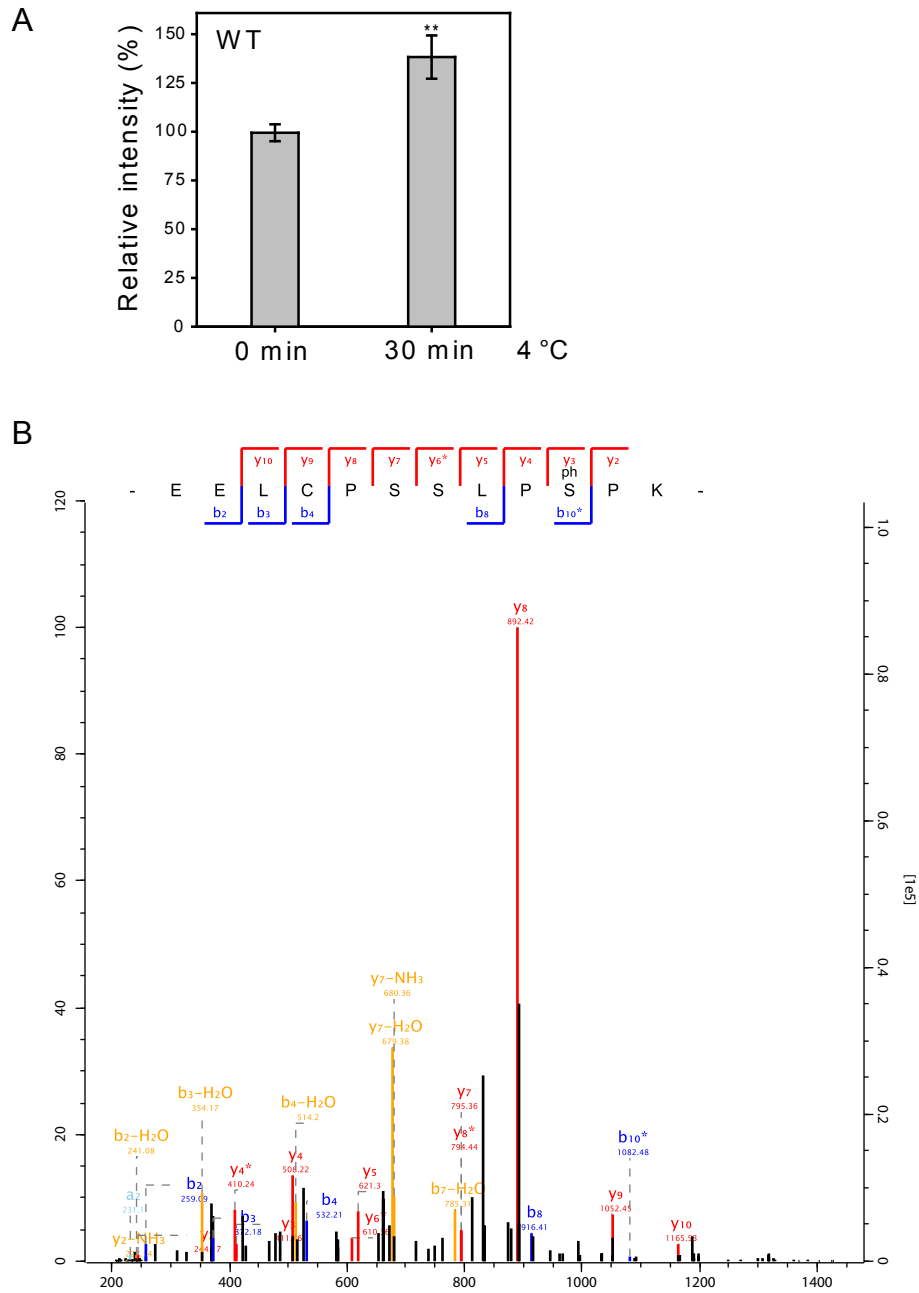

Figure S4. The phosphorylation of ICE1 *in vivo*. Related to Figure 5.

(A) The wild-type seedlings were treated with or without low temperature (4°C) for 30 min. The total proteins were extracted and applied for quantitative phosphoproteomics analysis. The relative phosphorylation level of ICE1 was assessed.

(B) The phosphorylation of the Ser403 residue of ICE1. Phosphoproteomics was performed for wild-type seedlings and the phosphorylation residues of the ICE1 protein were analyzed.

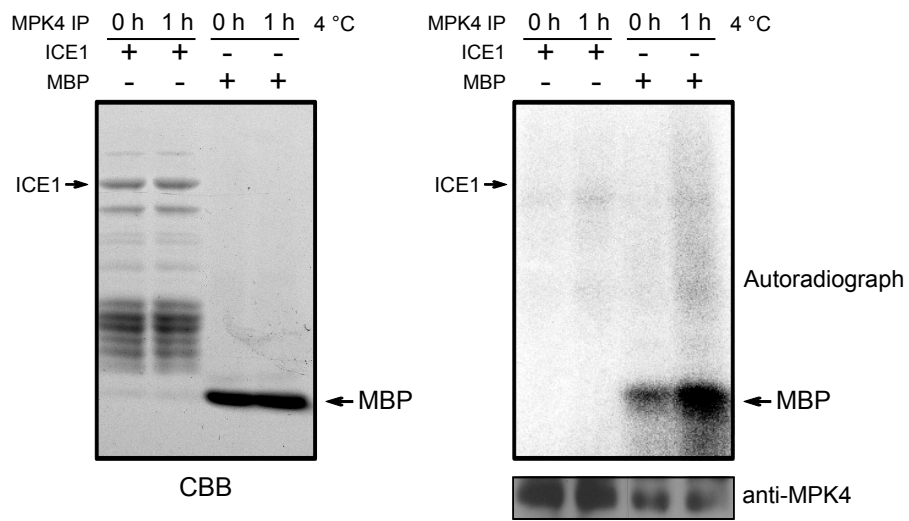

Figure S5. MPK4 is not able to phosphorylate ICE1. Related to Figure 5.

MPK4 was immunoprecipitated from wild-type seedlings incubated at 23°C or at 4°C for 1 h. The purified MPK4 was used for immunoprecipitation-kinase assay using ICE1 or MBP as a substrate.

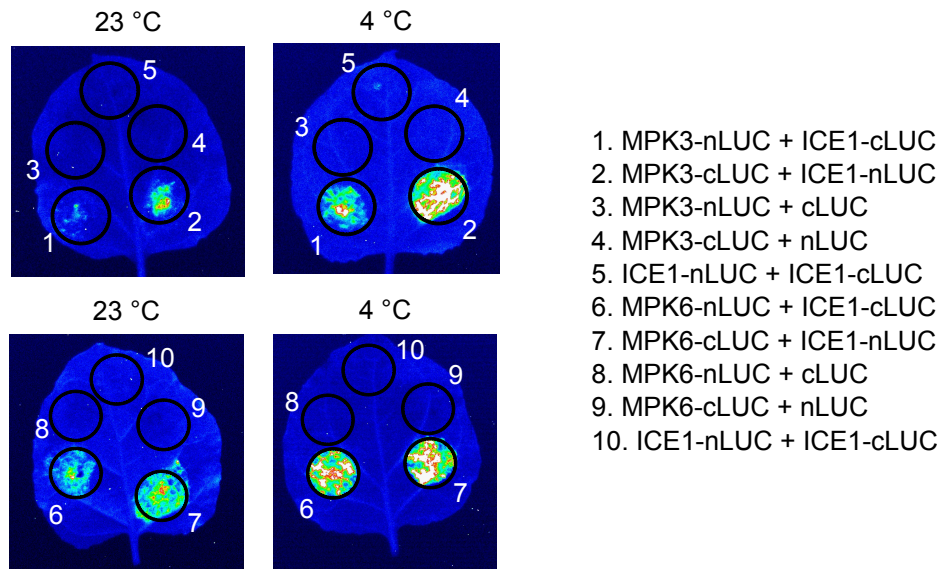

Figure S6. MPK3 and MPK6 interact with ICE1. Related to Figure 5 and 6.

The split luciferase complementation assay was applied to test the interaction between MPK3/6 and ICE1. The indicated constructs were transiently expressed in *Nicotiana benthamiana* using *Agrobacterium tumefaciens*-mediated method. Before taking images, the plants were treated with or without low temperature (4°C) for 1 h. Three biological replicates were conducted, and similar results were obtained.

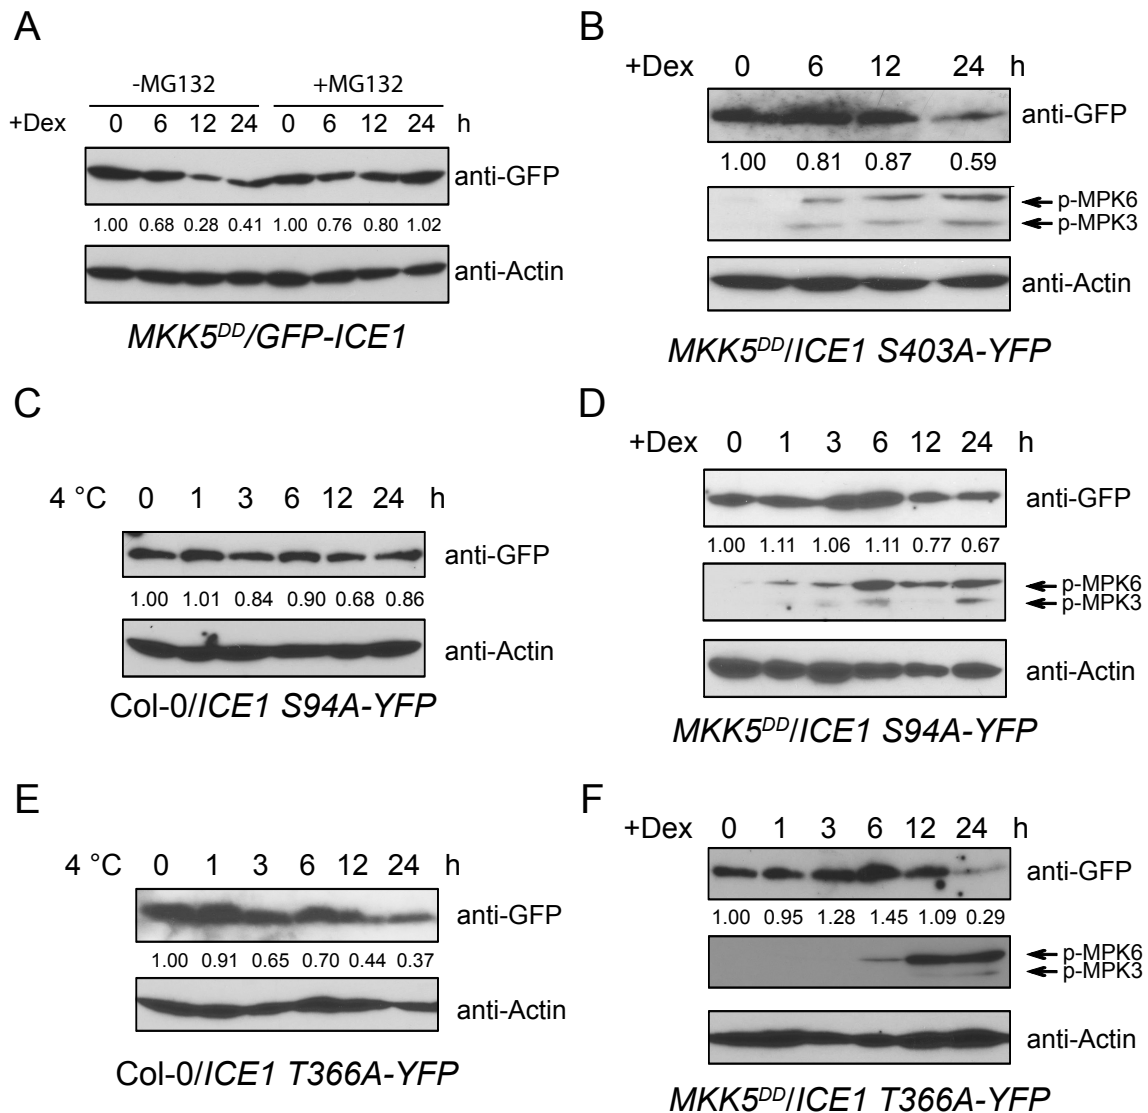

Figure S7. The phosphorylation sites of Ser94, Thr366, and Ser403 are required for the degradation of ICE1. Related to Figure 6.

(A) The seedlings of *MKK5<sup>DD</sup>/35S::GFP-ICE1* were treated with or without MG132 before they were incubated with Dex. The total proteins were extracted and immunoblotting assays were performed using anti-GFP and anti-Actin.

(B-F) The seedlings of each transgenic plant were treated with Dex or low temperature (4°C). The total proteins were extracted and immunoblotting assays were performed using anti-GFP, anti-pTEpY, and anti-Actin. The band intensity was evaluated using ImageJ software. All experiments were repeated three times with similar results.

Table S1. Comparison of the phosphorylation levels of the selected MAPK pathway components before and after cold treatment. Related to Figure 1.

| Type   | Gene ID   | Gene name | Phosphorylation site | Cold/Con* | p-value  |
|--------|-----------|-----------|----------------------|-----------|----------|
| MAPKKK | AT4G08500 | MEKK1     | S62                  | 1.59      | 6.09E-03 |
|        | AT1G63700 | YDA       | S720                 | 1.35      | 1.07E-01 |
|        | AT1G63700 | YDA       | S794                 | 1.92      | 1.01E-02 |
| MAPKK  | AT4G29810 | MKK2      | S65                  | 1.78      | 2.61E-03 |
| MAPK   | AT3G45640 | MPK3      | Y198                 | 2.35      | 7.27E-03 |
|        | AT4G01370 | MPK4      | T201                 | 2.41      | 2.47E-03 |
|        | AT4G01370 | MPK4      | Y203                 | 2.50      | 2.71E-03 |
|        | AT2G43790 | MPK6      | T221                 | 2.75      | 3.12E-03 |
|        | AT2G43790 | MPK6      | Y223                 | 2.75      | 3.22E-03 |
|        | AT1G18150 | MPK8      | S539                 | 0.46      | 2.58E-03 |
|        | AT3G18040 | MPK9      | Y187                 | 1.23      | 5.28E-01 |
|        | AT1G73670 | MPK15     | S511                 | 0.58      | 5.16E-03 |
|        | AT1G73670 | MPK15     | Y254                 | 0.58      | 2.43E-02 |
|        | AT5G19010 | MPK16     | Y189                 | 0.73      | 5.94E-02 |
|        | AT2G01450 | MPK17     | S397                 | 1.04      | 5.97E-01 |
|        | AT1G53510 | MPK18     | Y189                 | 1.00      | 9.95E-01 |
|        | AT3G14720 | MPK19     | Y189                 | 1.33      | 3.14E-01 |
|        | AT2G42880 | MPK20     | Y189                 | 0.81      | 1.95E-01 |

\*The proteins from the control and cold-treated wild-type seedlings were extracted for quantitative phosphoproteomics analysis. The phosphosites that were detected in all three biological replicates of samples were selected for quantitative analysis. The peak intensity of each identified phosphosite was calculated. The fold change between cold-treated and mock-treated samples was determined by dividing the average values of three biological replicates between the two samples.



Table S2. Primers used in this study. Related to STAR methods.

| Primer name     | Sequence                                                 | Usage                                                |
|-----------------|----------------------------------------------------------|------------------------------------------------------|
| CBF1 RT-LP      | GGAGACAATGTTGGGATGC                                      | Quantitative real-time PCR                           |
| CBF1 RT-RP      | TTAGTAACTCCAAAGCGACACG                                   | Quantitative real-time PCR                           |
| CBF2 RT-LP      | TGACGTGTCCTTATGGAGCTA                                    | Quantitative real-time PCR                           |
| CBF2 RT-RP      | CTGCACTCAAAAACATTGCA                                     | Quantitative real-time PCR                           |
| CBF3 RT-LP      | GATGACGACGTATCGTTATGGA                                   | Quantitative real-time PCR                           |
| CBF3 RT-RP      | TACTACTCGTTTCTCAGTTTTACAAAC                              | Quantitative real-time PCR                           |
| ICE1 RT-LP      | TGCCTGCTAAGAATCTGATGGC                                   | Quantitative real-time PCR                           |
| ICE1 RT-RP      | AGATCCAGGAGGAGTTGACTCA                                   | Quantitative real-time PCR                           |
| Actin RT-LP     | ATGACTCAGATCATGTTTGAGACC                                 | Quantitative real-time PCR                           |
| Actin RT-RP     | TCAGTAAGGTCACGACCAGCAA                                   | Quantitative real-time PCR                           |
| CRLK1 RT-LP     | GTAGCAGCTTTTGCTTACAAATGCA                                | semi-quantitative RT-PCR                             |
| CRLK1 RT-RP     | TTCTGACTCCTCCACTATCGGA                                   | semi-quantitative RT-PCR                             |
| CRLK2 RT-LP     | GCATACCTAGATATAACTACAAGG                                 | semi-quantitative RT-PCR                             |
| CRLK2 RT-RP     | CTGTCAAGTTCACAAGATTCC                                    | semi-quantitative RT-PCR                             |
| LB1.3           | ATTTTGCCGATTTCCGAAC                                      | Genotyping                                           |
| LB1 (SAIL)      | GCCTTTTCAGAAATGGATAAATAGCCTTGCTTCC                       | Genotyping                                           |
| SALK_052557 LP  | AATCGGAACCTCGAGATGAAG                                    | Genotyping                                           |
| SALK_052557 RP  | TTCACTCAAATCCTGACCCTG                                    | Genotyping                                           |
| SALK_151594 LP  | ATTTTTGTCAACAATGGCCTG                                    | Genotyping                                           |
| SALK_151594 RP  | TCTGCCTTTTCACGGAATATG                                    | Genotyping                                           |
| SALK_127507 LP  | CTCTGGCTCATCGTTATGTC                                     | Genotyping                                           |
| SALK_127507 RP  | ATCTATGTTGGCGTTTGAAC                                     | Genotyping                                           |
| SALK_027645 LP  | CCACCCTAGCAGAGAAACATAAC                                  | Genotyping                                           |
| SALK_027645 RP  | AACATGCTATCTGCCATCTGC                                    | Genotyping                                           |
| SAIL_511_H01 LP | TTCTTTTCCCAAATGGATTCC                                    | Genotyping                                           |
| SAIL_511_H01 RP | GTAAAGCCATCCCTGACTCC                                     | Genotyping                                           |
| SALK_056245 LP  | TTGCTCTGAATACACAGCAGC                                    | Genotyping                                           |
| SALK_056245 RP  | GTCTTAGAGATCAGCGGGGAC                                    | Genotyping                                           |
| SALK_016240 LP  | TACAGGCGAAAAACATGAACC                                    | Genotyping                                           |
| SALK_016240 RP  | ATTGGGCCTTGAATTC AATTC                                   | Genotyping                                           |
| SALK_103505 LP  | TTTATGGACGAGGTCCTCATG                                    | Genotyping                                           |
| SALK_103505 RP  | CCTTGTCTAGAACGGTTGTG                                     | Genotyping                                           |
| SALK_105078 LP  | GAGCAGCTGTAGGACGATTTG                                    | Genotyping                                           |
| SALK_105078 RP  | TCTCGCAGGAAATTCAGTTC                                     | Genotyping                                           |
| ICE1 g LP       | GGGGACAAGTTTGTACAAAAAAGCAGGCTTCGCGATTAGA<br>GTAAATCCGAGT | Plasmid construction<br>Transgenic plants            |
| ICE1 g RP       | GGGGACCACTTTGTACAAGAAAGCTGGGTGATCATAACA<br>GCATACCCTGC   | Plasmid construction<br>Transgenic plants            |
| ICE1 proto LP   | CGCGGATCCATGAACAGCGACGGTGTGGCT                           | Plasmid construction<br>Protoplast                   |
| ICE1 proto RP   | TTGCGGCCGCTCAAACCAAACCAGCGTAACCTG                        | Plasmid construction<br>Protoplast                   |
| ICE1 GST LP     | CCGGAATTCATGAACAGCGACGGTGTGGCT                           | Plasmid construction<br><i>In vitro</i> kinase assay |
| ICE1 GST RP     | TTGCGGCCGCTCAAACCAAACCAGCGTAACCTG                        | Plasmid construction<br><i>In vitro</i> kinase assay |
| ICE1 S94A LP    | CTATTGATTCTTCTTCTTCTGTGCTCCTTCTCAAGCTTTAG<br>TCTT        | Point mutation                                       |
| ICE1 S94A RP    | AAGACTAAAAGCTTGAGAAGGAGCACAAGAAGAAGAAGAA<br>TCAATAG      | Point mutation                                       |
| ICE1 S203A LP   | TCCGTTGGAGTTGGAAGGTTTGGTGTCTCCTGCTAATGGT                 | Point mutation                                       |
| ICE1 S203A RP   | ACCATTAGCAGGAGCACAAAACCTTCCAACCTCAACGGA                  | Point mutation                                       |
| ICE1 T366A LP   | CACAAATGAACTTGAGTCAGCTCCTCCTGGATCTTGC                    | Point mutation                                       |
| ICE1 T366A RP   | GCAAAGATCCAGGAGGAGCTGACTCAAGTTCATTGTG                    | Point mutation                                       |
| ICE1 T382A LP   | AAGCTTCCATCCGTTGGCACCTACACCGCAAAC                        | Point mutation                                       |

|               |                                                                          |                                                     |
|---------------|--------------------------------------------------------------------------|-----------------------------------------------------|
| ICE1 T382A RP | GTTTGCGGTGTAGGTGCCAACGGATGGAAGCTT                                        | Point mutation                                      |
| ICE1 T384A LP | CCATCCGTTGACACCTGCACCGCAAACCTTTC                                         | Point mutation                                      |
| ICE1 T384A RP | GAAAGAGTTTGCGGTGCAGGTGTCAACGGATGG                                        | Point mutation                                      |
| ICE1 S403A LP | GTTGTGTCCCTCTTCTTTACCAGCTCCTAAAGGCCAGCAA                                 | Point mutation                                      |
| ICE1 S403A RP | TTGCTGGCCTTTAGGAGCTGGTAAAGAAGAGGGACACAAC                                 | Point mutation                                      |
| MPK3 LP       | CGCGGATCCATGAACACCGGCGGTGGCCAA                                           | Plasmid construction<br>Kinase and protoplast assay |
| MPK3 RP       | TTGCGGCCGCTAACCGTATGTTGGATTGAGT                                          | Plasmid construction<br>Kinase and protoplast assay |
| MPK6 LP       | CGCGGATCCATGGACGGTGGTTCAGGTCAAC                                          | Plasmid construction<br>Kinase and protoplast assay |
| MPK6 RP       | TTGCGGCCGCTATTGCTGATATTCTGGATTG                                          | Plasmid construction<br>Kinase and protoplast assay |
| MPK4 LP       | CGCGGATCCATGTCGGCGGAGAGTTGTTTCG                                          | Plasmid construction<br>Protoplast assay            |
| MPK4 RP       | TTGCGGCCGCTCACACTGAGTCTTGAGGATTG                                         | Plasmid construction<br>Protoplast assay            |
| MPK3-LUC LP   | GGGGACAAGTTTGTACAAAAAAGCAGGCTTCGAAGGA<br>GATAGAACCATGAACACCGGCGGTGGCCAAT | Plasmid construction<br>Split-LUC assay             |
| MPK3-LUC RP   | GGGGACCACTTTGTACAAGAAAGCTGGGTACCGTATG<br>TTGGATTGAGTGCT                  | Plasmid construction<br>Split-LUC assay             |
| MPK6-LUC LP   | GGGGACAAGTTTGTACAAAAAAGCAGGCTTCGAAGGAG<br>ATAGAACCATGGACGGTGGTTCAGGTCAAC | Plasmid construction<br>Split-LUC assay             |
| MPK6-LUC RP   | GGGGACCACTTTGTACAAGAAAGCTGGGTCTTGCTGATA<br>TTCTGGATTGAAAGC               | Plasmid construction<br>Split-LUC assay             |
| ICE1-LUC LP   | GGGGACAAGTTTGTACAAAAAAGCAGGCTTCGAAGGAG<br>ATAGAACCATGGGTCTTGACGGAAACAATG | Plasmid construction<br>Split-LUC assay             |
| ICE1-LUC RP   | GGGGACCACTTTGTACAAGAAAGCTGGGTGATCATAACC<br>AGCATACCCTGCT                 | Plasmid construction<br>Split-LUC assay             |
